# Supplementary material
Source: PubMed Central journal article supplement (PMC6126535)
Supplement: NIHMS983622-supplement-1.pdf [file NIHMS983622-supplement-1.pdf]

**Supplemental Table 1. Association of Baseline Individual Antiretroviral Drug Use with Intermediate-stage Age-related Macular Degeneration in Patients with the Acquired Immune Deficiency Syndrome**

| Drug                                          | Number patients | AMD *(%) | P-value         |
|-----------------------------------------------|-----------------|----------|-----------------|
| Combovir (zidovudine, lamivudine)             |                 |          | 0.34            |
| No                                            | 1491            | 9.5      |                 |
| Yes                                           | 333             | 11.7     |                 |
| Zidovudine                                    |                 |          | 0.44            |
| No                                            | 1757            | 10.0     |                 |
| Yes                                           | 67              | 7.5      |                 |
| Didanosine                                    |                 |          | 0.43            |
| No                                            | 1561            | 10.1     |                 |
| Yes                                           | 263             | 8.4      |                 |
| Zalcitabine                                   |                 |          | 0.30            |
| No                                            | 1814            | 9.9      |                 |
| Yes                                           | 10              | 0        |                 |
| Stavudine                                     |                 |          | 0.11            |
| No                                            | 1340            | 10.5     |                 |
| Yes                                           | 484             | 8.1      |                 |
| Lamivudine                                    |                 |          | 0.90            |
| No                                            | 1309            | 9.8      |                 |
| Yes                                           | 515             | 9.9      |                 |
| Abacavir                                      |                 |          | 0.66            |
| No                                            | 1528            | 9.7      |                 |
| Yes                                           | 296             | 10.8     |                 |
| Adefovir                                      |                 |          | 0.01            |
| No                                            | 1809            | 9.7      |                 |
| Yes                                           | 15              | 33.3     |                 |
| Hydroxyurea                                   |                 |          | 0.35            |
| No                                            | 1776            | 10.0     |                 |
| Yes                                           | 48              | 6.2      |                 |
| Tenofovir                                     |                 |          | 0.29            |
| No                                            | 1664            | 9.7      |                 |
| Yes                                           | 160             | 11.9     |                 |
| Trizavir (zidovudine, lamivudine, abacavir)   |                 |          | 0.51            |
| No                                            | 1805            | 9.9      |                 |
| Yes                                           | 19              | 5.3      |                 |
| Epzicom (abacavir, lamivudine)                |                 |          | 0.44            |
| No                                            | 1782            | 9.8      |                 |
| Yes                                           | 42              | 14.3     |                 |
| Emtricitabine                                 |                 |          | 0.89            |
| No                                            | 1816            | 9.9      |                 |
| Yes                                           | 8               | 12.5     |                 |
| Truvada (emtricitabine, tenofovir)            |                 |          | 0.61            |
| No                                            | 1687            | 10.0     |                 |
| Yes                                           | 137             | 8.8      |                 |
| Atripla (emtricitabine, tenofovir, efavirenz) |                 |          | NA <sup>†</sup> |

|     |      |     |  |
|-----|------|-----|--|
| No  | 1824 | 9.9 |  |
| Yes | 0    | NA  |  |

\*AMD = age-related macular degeneration; percent with intermediate-stage AMD reported. †NA = not applicable.
